# Supplementary material for: Eutherians experienced elevated evolutionary rates in the immediate aftermath of the Cretaceous–Palaeogene mass extinction
Source: PubMed Central journal article supplement (PMC4936024; doi:10.1098/rspb.2015.3026), 2016-06-29

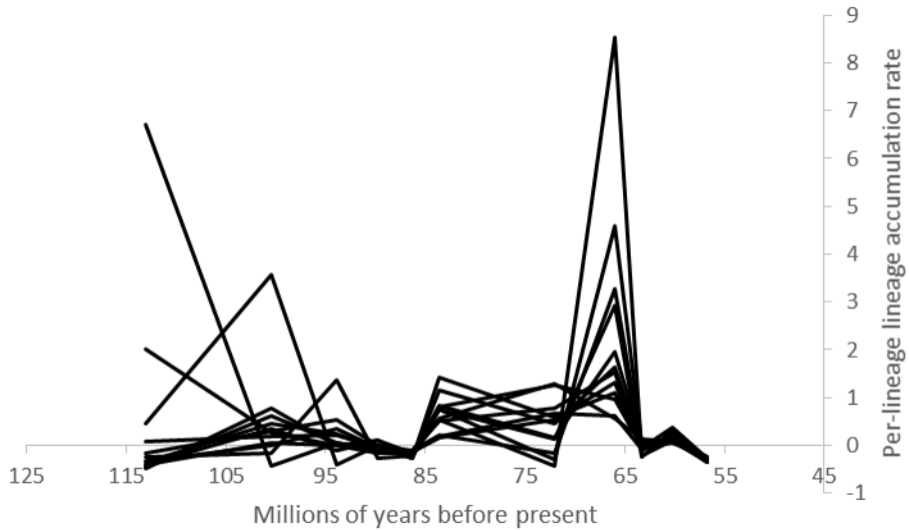

Supplement: rspb20153026supp2.pdf [file rspb20153026supp2.pdf]
