# Supplementary material for: Eutherians experienced elevated evolutionary rates in the immediate aftermath of the Cretaceous–Palaeogene mass extinction
Source: PubMed Central journal article supplement (PMC4936024; doi:10.1098/rspb.2015.3026), 2016-06-29
Supplement: rspb20153026supp3.pdf [file rspb20153026supp3.pdf]

**Table S1 – Dates of the Cretaceous geological stages and Cenozoic North American Land Mammal Ages as used for dating the topologies and determining taxon occurrences.**

| STAGE         | START TIME | END TIME | STAGE             | START TIME | END TIME |
|---------------|------------|----------|-------------------|------------|----------|
| BERRIASIAN    | 145        | 139.8    | TIFFANIAN         | 60.2       | 56.8     |
| VALANGINIAN   | 139.8      | 132.9    | CLARKFORKIAN      | 56.8       | 55.8     |
| HAUTERIVIAN   | 132.9      | 129.4    | WASATCHIAN        | 55.8       | 50.3     |
| BARREMIAN     | 129.4      | 125      | BRIDGERIAN        | 50.3       | 46.2     |
| APTIAN        | 125        | 113      | UINTAN            | 46.2       | 42       |
| ALBIAN        | 113        | 100.5    | DUCHESNEAN        | 42         | 38       |
| CENOMANIAN    | 100.5      | 93.9     | CHADRONIAN        | 38         | 33.9     |
| TURONIAN      | 93.9       | 89.8     | ORELLAN           | 33.9       | 30.8     |
| CONIACIAN     | 89.8       | 86.3     | ARIKAREEAN        | 30.8       | 20.6     |
| SANTONIAN     | 86.3       | 83.6     | HEMINGFORDIAN     | 20.6       | 16.3     |
| CAMPANIAN     | 83.6       | 72.1     | BARSTOVIAN        | 16.3       | 13.6     |
| MAASTRICHTIAN | 72.1       | 66       | CLARENDONIAN      | 13.6       | 10.3     |
| PUERCAN       | 66         | 63.3     | HEMPHILLIAN       | 10.3       | 4.9      |
| TORREJONIAN   | 63.3       | 60.2     | BLANCAN TO RECENT | 4.9        | 0        |
