# Supplementary material for: Eutherians experienced elevated evolutionary rates in the immediate aftermath of the Cretaceous–Palaeogene mass extinction
Source: PubMed Central journal article supplement (PMC4936024; doi:10.1098/rspb.2015.3026), 2016-06-29
Supplement: rspb20153026supp4.pdf [file rspb20153026supp4.pdf]

**Table S2 – Occurrences of each genus in this analysis in the time bins from Table 1. Stage 1 is the Berriasian, Stage 12 the Maastrichtian, Stage 13 the Puercan, and so on.**

| TAXON                 | FIRST STAGE | LAST STAGE | TAXON                     | FIRST STAGE | LAST STAGE |
|-----------------------|-------------|------------|---------------------------|-------------|------------|
| <i>Peramus</i>        | 1           | 1          | <i>Mimatuta</i>           | 13          | 13         |
| <i>Deltatheridium</i> | 11          | 12         | <i>Desmatoclaenus</i>     | 13          | 15         |
| <i>Sheikhdzheilia</i> | 6           | 7          | <i>Protoselene</i>        | 13          | 15         |
| <i>Avitotherium</i>   | 11          | 11         | <i>Bunophorus</i>         | 17          | 18         |
| <i>Gallolestes</i>    | 11          | 11         | <i>Diacodexis</i>         | 17          | 18         |
| <i>Alostera</i>       | 11          | 12         | <i>Homacodon</i>          | 18          | 20         |
| <i>Parazhelestes</i>  | 9           | 9          | <i>Hyopsodus</i>          | 16          | 20         |
| <i>Aspanlestes</i>    | 9           | 11         | <i>Meniscotherium</i>     | 17          | 17         |
| <i>Zhelestes</i>      | 8           | 9          | <i>Phenacodus</i>         | 14          | 18         |
| <i>Paranyctoides</i>  | 8           | 12         | <i>Macrocranion</i>       | 15          | 20         |
| <i>Batodon</i>        | 11          | 12         | <i>Alsaticopithecus</i>   | 18          | 18         |
| <i>Maelestes</i>      | 11          | 11         | <i>Teilhardimys</i>       | 15          | 18         |
| <i>Bobolestes</i>     | 6           | 7          | <i>Apheliscus</i>         | 15          | 17         |
| <i>Bulaklestes</i>    | 9           | 9          | <i>Haplomylus</i>         | 15          | 19         |
| <i>Daulestes</i>      | 8           | 9          | <i>Hilalia</i>            | 18          | 18         |
| <i>Uchkudukodon</i>   | 9           | 9          | <i>Orthaspidotherium</i>  | 15          | 15         |
| <i>Kennalestes</i>    | 9           | 11         | <i>Pleuraspidotherium</i> | 15          | 15         |
| <i>Asioryctes</i>     | 11          | 11         | <i>Poebrotherium</i>      | 21          | 23         |
| <i>Ukhaatherium</i>   | 11          | 11         | <i>Gobiohyus</i>          | 18          | 21         |
| <i>Kulbeckia</i>      | 9           | 10         | <i>Leptomeryx</i>         | 21          | 23         |
| <i>Lainodon</i>       | 11          | 11         | <i>Elomeryx</i>           | 21          | 24         |
| <i>Zhangolestes</i>   | 5           | 7          | <i>Indohyus</i>           | 18          | 20         |
| <i>Barunlestes</i>    | 11          | 11         | <i>Pakicetus</i>          | 17          | 19         |
| <i>Alymlestes</i>     | 11          | 11         | <i>Rodhocetus</i>         | 19          | 19         |
| <i>Zalambdalestes</i> | 11          | 11         | <i>Aphronorus</i>         | 13          | 16         |
| <i>Cimolestes</i>     | 11          | 15         | <i>Pentacodon</i>         | 14          | 15         |
| <i>Puercolestes</i>   | 13          | 13         | <i>Conacodon</i>          | 13          | 13         |
| <i>Betonna</i>        | 13          | 13         | <i>Anisonchus</i>         | 13          | 15         |
| <i>Eoryctes</i>       | 17          | 17         | <i>Periptychus</i>        | 13          | 15         |
| <i>Chacopterygus</i>  | 13          | 13         | <i>Ectoconus</i>          | 13          | 13         |
| <i>Procerberus</i>    | 13          | 14         | <i>Hemithlaeus</i>        | 13          | 13         |
| <i>Purgatorius</i>    | 13          | 15         | <i>Esthonyx</i>           | 16          | 18         |
| <i>Protungulatum</i>  | 12          | 13         | <i>Alcidedorbignya</i>    | 13          | 13         |
| <i>Gypsonictops</i>   | 11          | 12         | <i>Coryphodon</i>         | 16          | 18         |
| <i>Leptictis</i>      | 20          | 22         | <i>Pantolambda</i>        | 14          | 15         |
| <i>Prodiacodon</i>    | 13          | 17         | <i>Titanoides</i>         | 15          | 16         |
| <i>Asiostylops</i>    | 14          | 14         | <i>Cyriacotherium</i>     | 15          | 16         |
| <i>Arctostylops</i>   | 15          | 16         | <i>Lambdotherium</i>      | 17          | 18         |
| <i>Chaetophractus</i> | 26          | 28         | <i>Litolophus</i>         | 16          | 16         |
| <i>Utaetus</i>        | 15          | 15         | <i>Molinodus</i>          | 13          | 13         |

|                       |    |    |                       |    |    |
|-----------------------|----|----|-----------------------|----|----|
| <i>Bradypus</i>       | 28 | 28 | <i>Haploconus</i>     | 13 | 14 |
| <i>Tamandua</i>       | 28 | 28 | <i>Tetraclaenodon</i> | 14 | 15 |
| <i>Procavia</i>       | 27 | 28 | <i>Copecion</i>       | 15 | 18 |
| <i>Eritherium</i>     | 15 | 15 | <i>Ectocion</i>       | 14 | 18 |
| <i>Potamogale</i>     | 28 | 28 | <i>Eohippus</i>       | 17 | 17 |
| <i>Adapisorex</i>     | 14 | 16 | <i>Hyracotherium</i>  | 17 | 17 |
| <i>Rhynchocyon</i>    | 23 | 28 | <i>Homogalax</i>      | 17 | 17 |
| <i>Chambius</i>       | 16 | 20 | <i>Heptodon</i>       | 17 | 17 |
| <i>Todralestes</i>    | 16 | 18 | <i>Oxyclaenus</i>     | 13 | 14 |
| <i>Dilambdogale</i>   | 21 | 21 | <i>Loxolophus</i>     | 13 | 14 |
| <i>Widanelfarasia</i> | 22 | 22 | <i>Eoconodon</i>      | 13 | 13 |
| <i>Lessnessina</i>    | 17 | 17 | <i>Goniacodon</i>     | 13 | 15 |
| <i>Tribosphenomys</i> | 15 | 16 | <i>Hapalodectes</i>   | 15 | 18 |
| <i>Paramys</i>        | 16 | 21 | <i>Ankalagon</i>      | 14 | 14 |
| <i>Rhombomylus</i>    | 17 | 17 | <i>Pachyaena</i>      | 15 | 17 |
| <i>Gomphos</i>        | 17 | 17 | <i>Dissacus</i>       | 13 | 17 |
| <i>Ptilocercus</i>    | 28 | 28 | <i>Mesonyx</i>        | 18 | 19 |
| <i>Tupaia</i>         | 25 | 28 | <i>Sinonyx</i>        | 16 | 16 |
| <i>Cynocephalus</i>   | 28 | 28 | <i>Arctocyon</i>      | 14 | 15 |
| <i>Elpidophorus</i>   | 14 | 15 | <i>Claenodon</i>      | 14 | 15 |
| <i>Worlandia</i>      | 16 | 16 | <i>Anacodon</i>       | 15 | 18 |
| <i>Plagiomene</i>     | 16 | 17 | <i>Thryptacodon</i>   | 14 | 17 |
| <i>Bisonalveus</i>    | 15 | 15 | <i>Chriacus</i>       | 13 | 17 |
| <i>Notharctus</i>     | 17 | 19 | <i>Onychonycteris</i> | 17 | 17 |
| <i>Adapis</i>         | 20 | 21 | <i>Icaronycteris</i>  | 16 | 18 |
| <i>Apatemys</i>       | 17 | 21 | <i>Didymictis</i>     | 15 | 19 |
| <i>Mixodectes</i>     | 13 | 15 | <i>Viverravus</i>     | 15 | 19 |
| <i>Elphidotarsius</i> | 14 | 15 | <i>Protictis</i>      | 14 | 19 |
| <i>Cantius</i>        | 17 | 19 | <i>Uintacyon</i>      | 15 | 19 |
| <i>Saxonella</i>      | 15 | 15 | <i>Vulpavus</i>       | 15 | 20 |
| <i>Lambertocyon</i>   | 15 | 16 | <i>Miacis</i>         | 17 | 21 |
| <i>Escavadodon</i>    | 14 | 14 | <i>Wyolestes</i>      | 17 | 17 |
| <i>Onychodectes</i>   | 13 | 13 | <i>Prolimmocyon</i>   | 16 | 18 |
| <i>Didelphodus</i>    | 17 | 20 | <i>Pyrocyon</i>       | 17 | 17 |
| <i>Acmeodon</i>       | 14 | 15 | <i>Dipsalidictis</i>  | 16 | 17 |
| <i>Gelastops</i>      | 13 | 15 | <i>Tytthaena</i>      | 15 | 16 |
| <i>Solenodon</i>      | 28 | 28 | <i>Bessoecetor</i>    | 14 | 15 |
| <i>Parapternodus</i>  | 17 | 17 | <i>Paleosinopa</i>    | 15 | 18 |
| <i>Leptacodon</i>     | 13 | 17 | <i>Pararyctes</i>     | 13 | 17 |
| <i>Wyonycteris</i>    | 16 | 17 | <i>Paleoryctes</i>    | 13 | 16 |
| <i>Litocherus</i>     | 14 | 15 | <i>Aptoryctes</i>     | 15 | 16 |
| <i>Centetodon</i>     | 17 | 23 | <i>Eurotamandua</i>   | 18 | 18 |
| <i>Blarina</i>        | 28 | 28 | <i>Palaeonodon</i>    | 16 | 17 |
| <i>Tubulodon</i>      | 17 | 17 | <i>Eomanis</i>        | 18 | 18 |
| <i>Domnina</i>        | 19 | 23 | <i>Pteropus</i>       | 28 | 28 |
| <i>Echinosorex</i>    | 28 | 28 | <i>Plesiadapis</i>    | 14 | 17 |

|                  |    |    |                      |    |    |
|------------------|----|----|----------------------|----|----|
| <i>Uropsilus</i> | 28 | 28 | <i>Simpsonotus</i>   | 15 | 15 |
| <i>Desmana</i>   | 27 | 28 | <i>Protolipterna</i> | 15 | 15 |
| <i>Oreotalpa</i> | 21 | 21 |                      |    |    |
